# Supplementary material for: Depletion of PSMD14 suppresses bladder cancer proliferation by regulating GPX4
Source: PeerJ. 2023 Jan 6;11:e14654. doi: 10.7717/peerj.14654 (PMC9828270; doi:10.7717/peerj.14654)
Supplement: Supplemental Information 2 [file peerj-11-14654-s002.xlsx]

## Sheet: Data for 181 paitents 
No.	Gender	Age	Tumor invasion	Tumor diameter (cm)	Tumor stage	Bowel wall invasion (T)	Lymph node metastasis (N)	Vascular invasion	Lymphovascular invasion	Smoking history	Alcohol intake history	BC family history	DFS(month)	Recrudescence	OS(month)	Death	Tumor expression for PSMD14	Adjacent normal tissues expression			门诊号	取材医生
1	female	70	yes	4	3	3	yes	yes	no	yes	yes	no	33	yes	33	yes	low	low				陈云庆
2	male	76	no	3	1	Ta	no	no	no	no	no	no	69	no	69	no	low	low				张丽
3	male	71	yes	2	2	1	no	no	no	yes	no	no	28	yes	69	no	high	low				候峰
4	male	77	yes	3	1	1	no	no	no	no	no	no	69	no	69	no	high	low				张丽
5	female	50	no	3	2	Ta	no	no	no	yes	yes	no	23	yes	43	yes	high	low				邹玉玮
6	female	74	no	2	1	Ta	no	no	no	yes	no	no	69	no	69	no	high	low				候峰
7	female	78	yes	7.5	3	4	yes	no	no	no	yes	yes	66	no	66	no	high	low				张丽
8	female	51	no	3	1	Ta	no	no	no	yes	no	no	35	yes	66	no	low	low				陈云庆
9	male	59	yes	3	2	2	no	yes	yes	yes	yes	no	13	yes	33	yes	high	low				李敬敬
10	male	70	no	2	1	Ta	no	no	no	no	no	no	66	no	66	no	high	low				邢会霞
11	male	41	yes	2	2	1	no	no	no	no	yes	no	66	no	66	no	high	low				周璇
12	female	65	yes	5	2	2	no	yes	yes	yes	yes	yes	66	no	66	no	high	low				周璇
13	male	64	no	2.5	1	Ta	no	no	no	no	no	no	66	no	66	no	high	high				邢会霞
14	male	46	no	2.5	1	Ta	no	no	no	yes	yes	no	66	no	66	no	low	low				邢会霞
15	male	64	yes	6	2	2	no	no	no	no	no	no	32	yes	65	no	low	high				武杰
16	male	65	yes	15	3	3	yes	no	no	yes	yes	no	12	yes	32	yes	high	low				王伟
17	male	68	no	2	1	Ta	no	no	no	yes	no	no	63	no	63	no	high	low				张丽
18	male	72	no	0.8	1	Ta	no	no	no	no	no	no	63	no	63	no	high	low				张丽
19	male	70	yes	4	2	1	no	no	no	no	no	yes	53	no	53	no	high	low				王伟
20	female	78	yes	4	2	3	no	no	yes	yes	yes	yes	22	yes	43	yes	high	low				徐进
21	female	61	yes	3	2	2	no	no	no	no	no	no	62	no	62	no	low	high				武杰
22	female	54	no	3	1	Ta	no	no	no	no	no	no	62	no	62	no	low	high				李敬敬
23	male	64	yes	3	2	2	no	no	no	no	no	no	62	no	62	no	low	low				邹玉玮
24	female	59	yes	4	3	3	yes	yes	no	no	yes	no	16	yes	36	yes	low	low				陈云庆
25	male	68	no	4	1	Ta	no	no	no	yes	yes	no	61	no	61	no	low	low				王伟
26	male	57	no	4	1	1	no	no	no	no	no	no	61	no	61	no	low	high				丁晓燕
27	female	76	yes	3	3	4	yes	yes	yes	yes	yes	no	9	yes	17	yes	high	low				周璇
28	male	75	yes	4	2	2	no	no	no	yes	yes	no	31	yes	32	yes	low	high				武杰
29	male	65	no	7	1	Ta	no	no	no	no	no	yes	61	no	61	no	low	high				徐进
30	male	65	yes	2.5	2	3	no	no	no	yes	no	no	61	no	61	no	low	high				李敬敬
31	male	59	yes	4	2	2	no	no	no	yes	no	no	61	no	61	no	low	high				徐进
32	female	77	yes	4.4	3	3	yes	no	no	no	no	yes	61	no	61	no	high	low				王伟
33	male	71	no	2.5	1	Ta	no	no	no	yes	no	no	30	yes	60	no	high	low				王伟
34	male	57	no	4	1	Ta	no	no	no	no	no	yes	60	no	60	no	high	low				吴金锟
35	female	63	no	10	2	2	no	no	no	yes	no	no	14	yes	44	yes	high	low				吴金锟
36	male	61	yes	2	2	2	no	no	no	yes	no	no	20	yes	60	no	high	low				徐进
37	male	73	yes	3	2	2	no	no	no	no	no	no	60	no	60	no	high	low				邹莉娜
38	female	61	yes	1.7	2	2	no	no	no	yes	yes	no	11	yes	25	yes	high	low				李敬敬
39	male	59	yes	3	2	2	no	no	no	yes	yes	no	60	no	60	no	high	low				武杰
40	female	65	no	2.5	1	Ta	no	no	no	no	yes	no	59	no	59	no	high	low				武杰
41	male	53	no	2	1	Ta	no	no	no	no	no	no	59	no	59	no	high	low				邹丽娜
42	male	66	yes	4	2	2	no	no	yes	no	yes	yes	29	yes	59	no	high	low				李敬敬
43	male	64	no	1	1	Ta	no	no	no	no	no	no	58	no	58	no	high	low				徐进
44	female	73	yes	3.7	3	4	yes	no	no	no	no	yes	48	yes	58	no	high	low				徐进
45	male	65	no	3	1	Ta	yes	no	no	no	no	no	58	no	58	no	high	low				周璇
46	female	59	yes	2.8	2	2	no	no	no	yes	no	no	16	yes	36	yes	high	low				邹丽娜
47	male	51	no	3	1	1	no	no	no	no	no	no	57	no	57	no	high	low				张丽
48	male	73	no	1	1	Ta	no	no	no	no	yes	no	56	no	56	no	low	high				张丽
49	male	70	no	2.5	1	Ta	no	no	no	yes	yes	no	12	yes	27	yes	high	low				孙孟琦
50	male	71	yes	4	2	2	no	no	no	no	no	yes	56	no	56	no	high	low				丁晓燕
51	male	73	yes	2.2	2	3	no	no	no	no	yes	no	13	yes	23	yes	low	high				孙孟琦
52	male	53	no	2.5	1	Ta	no	no	no	no	no	no	55	no	55	no	low	high				卢晓
53	male	63	no	3	1	1	no	no	no	no	no	no	25	yes	54	O	high	low				王伟
54	female	77	yes	4.7	3	4	yes	no	yes	yes	yes	yes	19	yes	39	yes	high	low				武杰
55	male	64	no	4	1	Ta	no	no	no	no	no	no	55	no	55	no	low	high				武杰
56	female	59	no	3.5	1	1	no	no	no	no	yes	no	55	no	55	no	low	high				孙孟琦
57	male	77	yes	3	2	2	no	no	no	no	no	no	55	no	55	no	low	high				邹丽娜
58	female	74	yes	6	3	3	yes	yes	yes	yes	yes	yes	54	no	54	no	high	low				候峰
59	male	72	no	1.5	1	Ta	no	no	no	no	no	no	54	no	54	no	high	low				陈云庆
60	female	52	yes	8	3	2	yes	no	no	yes	yes	yes	24	yes	54	no	high	low				侯峰
61	male	54	no	3	1	Ta	no	no	no	no	no	no	53	no	53	no	high	low				张丽
62	male	65	no	5	1	Ta	no	no	no	no	yes	yes	53	no	53	no	high	low				李祎南
63	male	27	no	3	1	Ta	no	no	no	yes	no	no	53	no	53	no	low	high				李祎南
64	male	72	yes	2.5	2	2	no	no	no	no	yes	no	33	yes	53	no	high	low				李祎南
65	male	59	yes	2.3	3	4	yes	no	no	yes	yes	no	53	no	53	no	high	low				武杰
66	male	62	no	3	1	Ta	no	no	no	no	no	no	22	yes	52	no	high	low				展晓红
67	male	73	yes	2	3	3	yes	yes	no	yes	no	no	26	yes	46	no	high	low				李祎南
68	male	41	yes	1.5	2	2	no	no	no	yes	no	no	53	no	53	no	high	low				何冰
69	male	55	no	1.5	2	2	no	no	no	no	yes	no	53	no	53	no	high	low				孙孟琦
70	male	69	yes	2	2	2	no	no	no	yes	yes	no	53	no	53	no	high	low				李丹
71	female	35	no	0.5	1	Ta	no	no	no	no	no	no	53	no	53	no	high	low				武杰
72	female	76	no	1.2	1	Ta	no	no	no	no	yes	no	53	no	53	no	low	high				付伟伟
73	male	61	no	3	1	Ta	no	no	no	yes	no	no	53	no	53	no	high	low				卢晓
74	female	76	yes	2.5	3	2	yes	no	yes	yes	yes	no	18	yes	52	no	low	high				陈云庆
75	male	52	yes	2	2	2	no	no	no	no	no	no	52	no	52	no	high	low				侯峰
76	male	64	yes	2.5	2	2	no	no	no	yes	no	no	52	no	52	no	high	low				何冰
77	male	50	no	2.5	3	1	yes	no	no	no	no	no	30	yes	50	yes	high	low				卢晓
78	male	55	yes	7	2	2	no	yes	no	yes	yes	no	29	yes	50	no	low	high				邹玉玮
79	female	28	no	1.5	1	1	no	no	no	no	yes	no	31	yes	51	no	high	low				侯峰
80	male	58	no	4	1	Ta	no	no	no	yes	no	yes	51	no	51	no	high	low				徐进
81	male	79	no	1.5	1	Ta	no	no	no	yes	no	no	50	no	50	no	high	low				徐进
82	male	78	yes	4.5	2	2	no	no	no	no	no	yes	28	yes	29	yes	high	low				付伟伟
83	male	55	no	2.5	1	Ta	no	no	no	yes	yes	no	48	no	48	no	high	low				邹玉玮
84	female	52	no	2.5	1	Ta	no	no	no	yes	yes	no	48	no	48	no	low	high				陈云庆
85	male	66	yes	2	2	2	no	no	no	no	no	no	48	no	48	no	high	low				侯峰
86	male	57	yes	7	2	2	no	no	no	yes	yes	yes	11	yes	48	no	high	low				李亚男
87	female	62	yes	2	3	2	yes	yes	no	no	no	no	18	yes	38	yes	high	low				武杰
88	male	56	no	2	1	Ta	no	no	no	no	no	no	48	no	48	no	high	low				周璇
89	female	63	yes	2	3	3	yes	no	yes	no	yes	no	11	yes	11	yes	high	low				武杰
90	male	57	yes	6	2	2	no	no	no	no	no	no	47	no	47	no	low	high				张丽
91	female	55	no	3	1	1	no	no	no	no	yes	no	47	no	47	no	low	high				候峰
92	male	51	yes	3	2	2	no	no	no	no	no	no	47	no	47	no	low	high				李丹
93	female	62	yes	4	2	2	no	no	no	no	yes	yes	16	yes	16	yes	high	low				李祎南
94	male	77	no	4	1	Ta	no	no	no	no	no	yes	25	yes	45	no	high	low				卢晓
95	male	55	yes	2.5	2	2	no	no	no	no	yes	no	32	yes	45	no	high	low				孙孟琦
96	male	79	yes	4	2	2	no	no	no	no	yes	no	43	no	43	no	low	high				展晓红
97	male	73	yes	2.5	2	2	no	no	no	no	yes	no	43	no	43	no	low	high				李亚男
98	male	55	yes	4	2	2	no	yes	no	no	yes	yes	15	yes	42	yes	high	low				李祎南
99	female	73	yes	3	2	2	no	no	no	no	no	no	42	no	42	no	low	high				张丽
100	female	75	yes	4	2	2	no	no	yes	no	no	yes	42	no	42	no	high	low				孙孟琦
101	male	66	no	4	1	1	no	yes	no	no	no	yes	42	no	42	no	high	low				邹玉玮
102	male	63	yes	4	2	2	no	yes	no	no	no	yes	67	no	67	no	high	low				户燕姣
103	male	57	yes	4	2	2	no	no	no	no	no	yes	67	no	67	no	high	low				谷海燕
104	male	77	yes	2.2	2	2	no	no	no	no	no	no	67	no	67	no	high	low				王伟
105	male	64	no	3	1	Ta	no	no	no	no	no	no	67	no	67	no	low	high				王伟
106	female	77	yes	3.5	3	4	yes	yes	yes	no	no	no	23	yes	23	yes	high	low				王伟
107	female	70	yes	8	3	2	no	no	no	no	yes	yes	16	yes	66	no	high	low				王伟
108	female	63	yes	2.5	3	2	yes	no	yes	no	yes	no	17	yes	17	yes	high	low				王彦
109	male	77	yes	3	2	2	no	no	no	no	yes	no	33	yes	65	no	high	low				邵世宏
110	male	54	yes	3.5	2	2	no	no	no	no	yes	no	22	yes	42	no	high	low				王彦
111	male	65	no	4	1	Ta	no	no	no	no	yes	yes	63	no	63	no	high	low				王太东
112	male	67	no	3	1	Ta	no	no	no	no	no	no	63	no	63	no	high	low				王娇
113	male	58	no	2	1	Ta	no	no	no	no	no	no	63	no	63	no	high	low				冉祥英
114	male	54	no	1.5	1	Ta	no	no	no	no	yes	no	63	no	63	no	high	low				王继纲
115	female	71	yes	4	2	Ta	no	no	no	no	no	yes	15	yes	25	yes	high	low				王继纲
116	male	65	no	1.2	1	Ta	no	no	no	no	yes	no	63	no	63	no	high	low				林东亮
117	male	75	yes	3	2	1	no	no	no	no	no	no	63	no	63	no	high	low				王娇
118	male	69	yes	1.5	2	1	no	no	no	no	yes	no	63	no	63	no	high	low				王娇
119	male	50	no	1.2	1	1	no	no	no	no	no	no	63	no	63	no	high	low				冉祥英
120	male	65	yes	2	2	1	no	no	no	no	no	no	63	no	63	no	high	low				冉祥英
121	male	52	yes	6	2	2	no	yes	no	no	yes	yes	34	yes	34	yes	high	low				王太东
122	male	51	no	3	1	1	no	no	no	no	no	no	62	no	62	no	high	low				王太东
123	male	55	no	3.5	1	1	no	no	no	no	yes	no	62	no	62	no	high	low				王娇
124	female	68	no	6.5	1	1	no	no	no	no	no	no	62	no	62	no	low	high				王娇
125	male	68	yes	3	2	1	no	no	no	no	yes	no	16	yes	16	yes	high	low				王伟
126	male	64	yes	6	2	1	no	no	no	no	no	yes	60	no	60	no	high	low				邵世宏
127	male	52	no	5	1	1	no	no	no	no	yes	yes	20	yes	60	no	high	low				冯晓彤
128	female	73	yes	7.5	3	4	yes	yes	no	no	no	yes	21	yes	21	yes	high	low				刘荟婷
129	male	65	yes	1.5	3	2	yes	no	no	no	yes	no	17	yes	17	yes	high	low				李玉静
130	female	70	yes	4	2	3	no	no	no	no	no	yes	59	no	59	no	high	low				冯晓彤
131	male	60	yes	3	2	2	no	no	no	no	yes	no	58	no	58	no	high	low				李玉静
132	male	67	yes	5.5	2	2	no	no	no	no	no	yes	58	no	58	no	high	high				王太东
133	male	55	yes	3.5	2	2	no	no	no	no	yes	yes	17	yes	37	yes	high	low				王太东
134	female	71	no	2.8	1	1	no	no	no	no	no	no	58	no	58	no	high	low				冉祥英
135	male	59	no	1.2	1	1	no	no	no	no	yes	no	57	no	57	no	high	low				邵世宏
136	female	51	yes	3.5	2	1	no	no	no	no	yes	no	57	no	57	no	low	high				王伟
137	male	72	no	3.5	1	1	no	no	no	no	no	yes	57	no	57	no	high	low				李玉静
138	male	64	no	2.5		1	no	no	no	no	no	no	57	no	57	no	high	low				冉祥英
139	female	67	yes	4.5	3	4	no	yes	yes	no	yes	yes	36	yes	56	no	high	low				王伟
140	male	73	no	2	1	1	no	no	no	no	no	no	56	no	56	no	high	high				户燕姣
141	male	65	yes	3	2	2	no	no	no	no	no	no	54	no	54	no	high	low				户燕姣
142	male	78	no	5	1	1	no	no	no	no	yes	yes	54	no	54	no	high	low				王丽丽
143	male	62	no	2.5	1	1	no	no	no	no	yes	no	54	no	54	no	high	low				李敬敬
144	male	64	no	1.5	1	1	no	no	no	no	no	no	24	yes	54	no	high	low				王伟
145	male	54	no	2.8	1	1	no	no	no	no	no	no	54	no	54	no	high	low				王伟
146	male	71	yes	4	2		no	no	no	no	no	yes	54	no	54	no	high	low				刘喜凤
147	male	79	no	2	2	1	no	no	no	no	yes	no	54	no	54	no	high	low				王丽丽
148	female	75	yes	3	2	2	no	no	no	no	no	no	54	no	54	no	high	low				李敬敬
149	male	61	yes	4.8	2	2	no	yes	no	no	yes	yes	8	yes	28	yes	high	low				刘喜凤
150	male	57	no	4	1	1	no	no	no	no	yes	yes	53	no	53	no	high	low				王彦
151	female	46	yes	7	3	2	no	yes	yes	no	yes	yes	23	yes	53	no	high	low				王继纲
152	male	50	yes	3	2	2	no	no	no	no	no	no	53	no	53	no	high	low				刘喜凤
153	male	70	yes	3	2	2	no	no	no	no	yes	no	53	no	53	no	high	low				户燕姣
154	male	77	no	2.5	1	1	no	no	no	no	no	no	53	no	53	no	low	high				冉祥英
155	male	62	yes	2	1	1	no	no	no	no	yes	no	53	no	53	no	high	low				谷海燕
156	male	56	yes	6	2	1	no	no	no	no	yes	yes	51	no	51	no	high	low				刘喜凤
157	male	66	yes	3	2	2	no	no	no	no	yes	no	51	no	51	no	high	high				户燕姣
158	male	55	yes	1	2	1	no	no	no	no	no	no	49	no	49	no	high	high				靳步
159	male	77	no	3.5	1	1	no	no	no	no	no	yes	49	no	49	no	high	high				李亚男
160	female	56	no	3	1	1	no	no	no	no	no	no	49	no	49	no	high	high				冉祥英
161	female	71	yes	2.5	3	2	no	no	no	no	no	no	19	yes	49	no	high	high				户燕姣
162	male	61	yes	4	2	1	no	no	no	no	yes	no	48	no	48	no	low	high				王娇
163	male	61	yes	4.5	2	2	no	no	no	no	yes	yes	9	yes	29	yes	high	high				王娇
164	male	76	no	5	2	1	no	no	no	no	no	yes	48	no	48	no	high	high				李亚男
165	female	70	no	2	1	1	no	no	no	no	no	no	48	no	48	no	high	low				王伟
166	male	74	no	3	1	1	no	no	no	no	yes	no	47	no	47	no	high	low				户燕姣
167	female	39	yes	6.5	3	2	no	no	no	no	no	yes	47	no	47	no	low	high				孙孟琦
168	female	69	yes	2.5	2	3	no	yes	no	no	no	no	15	yes	35	yes	high	low				王彦
169	male	54	yes	6	3	1	yes	yes	no	no	no	no	46	no	46	no	low	high				李敬敬
170	female	48	yes	3.5	3	2	yes	yes	no	no	yes	yes	11	yes	31	yes	high	low				王继纲
171	male	53	yes	3	3	1	no	no	no	no	yes	no	46	no	46	no	low	low				邵世宏
172	male	58	yes	8	2	1	no	no	no	no	no	yes	45	no	45	no	low	high				王继纲
173	male	63	yes	2.5	2	1	no	no	no	no	no	no	45	no	45	no	low	low				张月娟
174	female	78	yes	5	2	1	no	no	no	no	no	yes	44	no	44	no	low	low				谷海燕
175	male	60	no	2.6	1	1	no	no	no	no	no	no	44	no	44	no	high	low				王奕方
176	male	60	no	2.5	1	1	no	no	no	no	no	no	44	no	44	no	high	low				安玉芬
177	female	47	no	2.2	2	1	no	no	no	no	no	no	44	no	44	no	high	low				王伟
178	male	47	yes	2	2	2	no	no	no	no	no	no	43	no	43	no	high	low				李丹
179	male	65	yes	3.5	3	4	no	no	no	no	yes	yes	14	yes	34	yes	high	low				邵世宏
180	male	64	yes	2.8	2	1	no	no	no	no	yes	no	44	no	44	no	high	low				王伟
181	male	67	no	6	2	1	no	no	no	no	no	yes	43	no	43	no	high	low				吉秋霞

## Sheet: Light absorbance for PSMD14-KD
		T24 Ctrl							5637 Ctrl
Time point (hours)	sample 1	sample 2	sample 3	sample 4	sample 5		Time point (hours)	sample 1	sample 2	sample 3	sample 4	sample 5
24	0.1795	0.1781	0.1789	0.1764	0.1773		24	0.2083	0.2055	0.2012	0.2084	0.2079
48	0.4414	0.4271	0.4642	0.4339	0.4234		48	0.4001	0.4092	0.4045	0.3993	0.3987
72	0.8378	0.8355	0.8554	0.8795	0.8275		72	0.7645	0.7647	0.7554	0.7699	0.7501
96	1.8881	1.8237	1.8565	1.7333	1.701		96	1.5327	1.5417	1.5555	1.6264	1.5808
		T24 -PSMD14-KD							5637 PSMD14-KD
Time point (hours)	sample 1	sample 2	sample 3	sample 4	sample 5		Time point (hours)	sample 1	sample 2	sample 3	sample 4	sample 5
24	0.1775	0.1801	0.1803	0.1781	0.1797		24	0.2058	0.2057	0.2035	0.2026	0.2094
48	0.4592	0.3883	0.4754	0.4394	0.3918		48	0.4303	0.4188	0.3987	0.409	0.3911
72	0.646	0.6827	0.689	0.699	0.6596		72	0.7056	0.7091	0.6732	0.6995	0.6399
96	1.4881	1.5412	1.4566	1.5635	1.4633		96	1.2777	1.3421	1.3021	1.2001	1.3861

## Sheet: Light absorbance for PSMD14-OE
				5637 Ctrl
		Time point (hours)	sample 1	sample 2	sample 3	sample 4	sample 5
		24	0.2207	0.2248	0.2314	0.2313	0.2405
		48	0.3905	0.3803	0.4251	0.4063	0.4122
		72	0.7775	0.7564	0.7585	0.6954	0.7501
		96	1.5541	1.574	1.579	1.5898	1.5601
				5637 PSMD14-OE
		Time point (hours)	sample 1	sample 2	sample 3	sample 4	sample 5
		24	0.2312	0.2333	0.2352	0.2444	0.2322
		48	0.4165	0.4218	0.4008	0.4265	0.4226
		72	0.9937	0.9669	0.9456	0.9865	0.9456
		96	1.8549	1.9246	1.8726	1.7476	1.9356

## Sheet: Absorbance for PSMD14-OE +RSL3
			5637 PSMD14-OE- Ctrl
	Time point (hours)	sample 1	sample 2	sample 3	sample 4	sample 5
	24	0.266	0.2733	0.274	0.2683	0.2722
	48	0.523	0.5122	0.5521	0.594	0.5596
	72	1.3881	1.4237	1.2965	1.3183	1.2955
	96	2.0311	2.0076	2.1111	1.9876	1.9943
			5637 PSMD14-OE+RSL3
	Time point (hours)	sample 1	sample 2	sample 3	sample 4	sample 5
	24	0.2623	0.2641	0.2619	0.2608	0.2673
	48	0.5378	0.5355	0.5554	0.5795	0.5275
	72	1.4881	1.4429	1.6466	1.4635	1.4617
	96	2.3987	2.3844	2.4377	2.464	2.4333

## Sheet: Absorbance for PSMD14-KD+ferr-1
Time point (hours)			T24 PSMD14-KD- Ctrl				Time point (hours)		5637 PSMD14-KD- Ctrl
24	0.154	0.1497	0.1552	0.1505	0.1563		24	0.2207	0.2248	0.2314	0.2313	0.2405
48	0.3217	0.3434	0.3538	0.3712	0.3345		48	0.3815	0.3945	0.3815	0.3792	0.3871
72	0.8543	0.8564	0.8123	0.7986	0.7866		72	0.7869	0.7716	0.798	0.7954	0.7653
96	1.6754	1.689	1.7908	1.6329	1.6554		96	1.6661	1.6435	1.598	1.6012	1.5467
Time point (hours)			T24 PSMD14-KD+ ferrostatin-1				Time point (hours)		5637 PSMD14-KD+ ferrostatin-1
24	0.1561	0.1605	0.1591	0.1693	0.1571		24	0.2298	0.2322	0.2343	0.2287	0.2454
48	0.32811	0.3369	0.3277	0.3308	0.367		48	0.39	0.367	0.39	0.3652	0.373
72	0.912	0.8976	0.8871	0.8532	0.8333		72	0.8122	0.8543	0.8834	0.8488	0.873
96	1.9221	1.9045	1.8743	1.923	1.9201		96	1.9008	1.8721	1.8864	1.895	1.9235

## Sheet: Animal experiment for PSMD14-KD
No. of mice	length (mm)	width (mm)	length *width	length *width* width	Volume			day
ctrl-1	2	2	4	8	4			6
ctrl-2	2	1	2	2	1			6
ctrl-3	2	2	4	8	4			6
ctrl-4	2	2	4	8	4			6
ctrl-5	2	1	2	2	1			6
KD-1	2	1	2	2	1			6
KD-2	2	2	4	8	4			6
KD-3	2	2	4	8	4			6
KD-4	2	2	4	8	4			6
KD-5	2	1	2	2	1			6
ctrl-1	4	3	12	36	18			12
ctrl-2	4	4	16	64	32			12
ctrl-3	4	4	16	64	32			12
ctrl-4	4	3	12	36	18			12
ctrl-5	4	3	12	36	18			12
KD-1	3	2	6	12	6			12
KD-2	4	3	12	36	18			12
KD-3	4	3	12	36	18			12
KD-4	4	3	12	36	18			12
KD-5	4	3	12	36	18			12
ctrl-1	7	6	42	252	126			18
ctrl-2	8	6	48	288	144			18
ctrl-3	7	7	49	343	171.5			18
ctrl-4	7	6	42	252	126			18
ctrl-5	7	7	49	343	171.5			18
KD-1	6	4	24	96	48			18
KD-2	6	4	24	96	48			18
KD-3	6	5	30	150	75			18
KD-4	6	4	24	96	48			18
KD-5	6	6	36	216	108			18
	length (mm)	width (mm)	high (mm)	length *width	length *width* width	Volume	weight(g)
ctrl-1	15	12	6	180	2160	1080	1.43	24
ctrl-2	13	11	8	143	1573	786.5	1.23	24
ctrl-3	12	11	10	132	1452	726	1.39	24
ctrl-4	12	12	11	144	1728	864	1.23	24
ctrl-5	11	11	10	121	1331	665.5	1.44	24
KD-1	15	8	4	120	960	480	0.75	24
KD-2	10	8	5	80	640	320	0.66	24
KD-3	10	8	6	80	640	320	0.64	24
KD-4	10	10	8	100	1000	500	0.73	24
KD-5	7	6	6	42	252	126	0.59	24

## Sheet: Animal experiment for PSMD14-OE
No. of mice	length (mm)	width (mm)	length *width	length *width* width	Volume			day
ctrl-1	2	2	4	8	4			6
ctrl-2	2	1	2	2	1			6
ctrl-3	2	2	4	8	4			6
ctrl-4	2	2	4	8	4			6
ctrl-5	2	1	2	2	1			6
OE-1	2	1	2	2	1			6
OE-2	2	2	4	8	4			6
OE-3	2	2	4	8	4			6
OE-4	2	2	4	8	4			6
OE-5	2	1	2	2	1			6
ctrl-1	4	4	16	64	32			12
ctrl-2	4	4	16	64	32			12
ctrl-3	4	3	12	36	18			12
ctrl-4	4	4	16	64	32			12
ctrl-5	4	4	16	64	32			12
OE-1	5	5	25	125	62.5			12
OE-2	5	4	20	80	40			12
OE-3	5	4	20	80	40			12
OE-4	4	3	12	36	18			12
OE-5	5	4	20	80	40			12
ctrl-1	7	5	35	175	87.5			18
ctrl-2	7	6	42	252	126			18
ctrl-3	7	6	42	252	126			18
ctrl-4	6	6	36	216	108			18
ctrl-5	8	7	56	392	196			18
OE-1	9	5	45	225	112.5			18
OE-2	9	6	54	324	162			18
OE-3	8	8	64	512	256			18
OE-4	9	7	63	441	220.5			18
OE-5	8	8	64	512	256			18
	length (mm)	width (mm)	high (mm)	length *width	length *width* width	Volume	weight(g)
ctrl-1	10	7	5	70	490	245	0.6	24
ctrl-2	10	8	7	80	640	320	0.77	24
ctrl-3	11	8	8	88	704	352	0.76	24
ctrl-4	13	10	8	130	1300	650	0.77	24
ctrl-5	15	10	10	150	1500	750	0.93	24
OE-1	13	11	11	143	1573	786.5	1.11	24
OE-2	12	10	10	120	1200	600	1.32	24
OE-3	14	12	7	168	2016	1008	1.08	24
OE-4	15	13	9	195	2535	1267.5	1.57	24
OE-5	15	14	7	210	2940	1470	1.44	24

## Sheet: RT-PCR for GPX4
		T24		5637		5637
		PSMD14		PSMD14		PSMD14
		Ctrl	KD	Ctrl	KD	Ctrl	OE
	GPX4	14.92	31.33	22.76	33.47	23.11	13.67
		14.33	32.45	23.89	34.09	22.97	14.49
		14.21	31.01	22.54	33.67	23.21	15.44
	GAPDH	21.94	22.78	24.56	24.89	23.66	24.77
		22.01	22.48	25.04	23.99	24.75	23.12
		21.78	21.95	24.17	25.12	24.22	23.86
